# Supplementary material for: Are Caregivers’ Feeding Competence and Autonomy Associated with Healthier Restaurant Food Purchases for Their Child at Fast Food or Counter Service Restaurants? A Cross-Sectional Study in a Diverse Sample of U.S. Caregivers
Source: MDPI journal article supplement (doi:10.3390/nu16040479), 2024-02-07
Supplement: s1 [file s1]

**Supplemental file**

**Survey:**

**Please answer the following questions:**

1. Are you 18 or older?

☐ Yes

☐ No

2. What year were you born? \_\_\_\_\_

3. Are you currently in the United States?

☐ Yes

☐ No

4. How often do you use each of the following social networks?

|           | Daily | A few times a week | Once a week | Rarely | Never |
|-----------|-------|--------------------|-------------|--------|-------|
| Facebook  |       |                    |             |        |       |
| Instagram |       |                    |             |        |       |
| Snapchat  |       |                    |             |        |       |
| Twitter   |       |                    |             |        |       |
| LinkedIn  |       |                    |             |        |       |
| Pinterest |       |                    |             |        |       |

5. Are you the **primary caregiver** for any children between the ages of 3 and 12?

☐ Yes

☐ No

6. What is your highest level of education?

☐ Less than 8<sup>th</sup> grade

☐ Some high school (grades 9 to 11)

☐ High school graduate (finished 12<sup>th</sup> grade) or GED

☐ Some college but no degree

☐ Associate's degree (AA, AS, etc.)

☐ Bachelor's degree (BA, BS, etc.)

☐ Graduate degree (MA, MS, MPH, JD, PhD, MD, etc.)

☐ Prefer not to answer

7. Do you identify as Hispanic or Latinx?

- ☐ Yes
- ☐ No
- ☐ Prefer not to answer

8. Do you consider yourself to be:

- ☐ American Indian or Alaska Native
- ☐ Asian
- ☐ Black or African American
- ☐ Native Hawaiian or other Pacific Islander
- ☐ White
- ☐ Some other race (specify): \_\_\_\_\_
- ☐ Prefer not to answer

9. What is your zip code? \_\_\_\_\_

1. What is your gender?

- ☐ Male
- ☐ Female
- ☐ Prefer to self-identify: \_\_\_\_\_
- ☐ Prefer not to answer

2. How many children do you have between the ages of 3 and 12 years old?

- ☐ One
- ☐ Two
- ☐ Three
- ☐ Four or more

3. *If one is selected:* How old is that child?

- ☐ 3
- ☐ 4
- ☐ 5
- ☐ 6
- ☐ 7
- ☐ 8
- ☐ 9
- ☐ 10
- ☐ 11
- ☐ 12

*If two or more is selected:* Of your children who are aged 3-12, how old is the **youngest**?

- ☐ 3
- ☐ 4
- ☐ 5
- ☐ 6
- ☐ 7
- ☐ 8
- ☐ 9
- ☐ 10
- ☐ 11
- ☐ 12

4. What is the sex of that child?

- ☐ Male
- ☐ Female
- ☐ Prefer not to answer

5. What is your relationship to that child?

- ☐ Parent
- ☐ Foster parent
- ☐ Grandparent
- ☐ Sibling
- ☐ Aunt or uncle
- ☐ Other \_\_\_\_\_

Please think of your child who is **X** years old when you answer the remaining questions.

For the next set of questions, please rate how much you agree with each statement when it comes to your **X** year-old.

6. I think I'm pretty good at feeding my **X** year-old fruits and vegetables. Choose one.

- ☐ Strongly agree
- ☐ Somewhat agree
- ☐ Neither agree nor disagree
- ☐ Somewhat disagree
- ☐ Strongly disagree
- ☐ Prefer not to answer

7. I am satisfied with my ability to feed my **X** year-old fruits and vegetables. Choose one.

- ☐ Strongly agree
- ☐ Somewhat agree
- ☐ Neither agree nor disagree
- ☐ Somewhat disagree
- ☐ Strongly disagree
- ☐ Prefer not to answer

8. I am skilled at feeding my **X** year-old fruits and vegetables. Choose one.
- ☐ Strongly agree
  - ☐ Somewhat agree
  - ☐ Neither agree nor disagree
  - ☐ Somewhat disagree
  - ☐ Strongly disagree
  - ☐ Prefer not to answer
9. I think I'm pretty good at saying no when my **X** year-old asks for sugar-sweetened beverages. Choose one.
- ☐ Strongly agree
  - ☐ Somewhat agree
  - ☐ Neither agree nor disagree
  - ☐ Somewhat disagree
  - ☐ Strongly disagree
  - ☐ Prefer not to answer
10. I am satisfied with my ability to say no when my **X** year-old asks for sugar-sweetened beverages. Choose one.
- ☐ Strongly agree
  - ☐ Somewhat agree
  - ☐ Neither agree nor disagree
  - ☐ Somewhat disagree
  - ☐ Strongly disagree
  - ☐ Prefer not to answer
11. I am skilled at saying no when my **X** year-old asks for sugar-sweetened beverages. Choose one.
- ☐ Strongly agree
  - ☐ Somewhat agree
  - ☐ Neither agree nor disagree
  - ☐ Somewhat disagree
  - ☐ Strongly disagree
  - ☐ Prefer not to answer
12. I think I'm pretty good at limiting desserts for my **X** year-old to special occasions only. Choose one.
- ☐ Strongly agree
  - ☐ Somewhat agree
  - ☐ Neither agree nor disagree
  - ☐ Somewhat disagree
  - ☐ Strongly disagree
  - ☐ Prefer not to answer

13. I am satisfied with my ability to limit desserts for my **X** year-old to special occasions only. Choose one.

- ☐ Strongly agree
- ☐ Somewhat agree
- ☐ Neither agree nor disagree
- ☐ Somewhat disagree
- ☐ Strongly disagree
- ☐ Prefer not to answer

14. I am skilled at limiting desserts for my **X** year-old to special occasions only. Choose one.

- ☐ Strongly agree
- ☐ Somewhat agree
- ☐ Neither agree nor disagree
- ☐ Somewhat disagree
- ☐ Strongly disagree
- ☐ Prefer not to answer

15. I believe I have some choice in what food my **X** year-old eats. Choose one.

- ☐ Strongly agree
- ☐ Somewhat agree
- ☐ Neither agree nor disagree
- ☐ Somewhat disagree
- ☐ Strongly disagree
- ☐ Prefer not to answer

16. The food I feed my **X** year-old is not my own choice. Choose one.

- ☐ Strongly agree
- ☐ Somewhat agree
- ☐ Neither agree nor disagree
- ☐ Somewhat disagree
- ☐ Strongly disagree
- ☐ Prefer not to answer

17. When I provide healthy food for my **X** year-old, it's because I feel like I have to. Choose one.

- ☐ Strongly agree
- ☐ Somewhat agree
- ☐ Neither agree nor disagree
- ☐ Somewhat disagree
- ☐ Strongly disagree
- ☐ Prefer not to answer

18. I feel close and connected with other moms on social media because of a shared interest in raising healthy kids. Choose one.

- ☐ Strongly agree

- ☐ Somewhat agree
- ☐ Neither agree nor disagree
- ☐ Somewhat disagree
- ☐ Strongly disagree
- ☐ Prefer not to answer

19. I feel a sense of intimacy with other moms on social media because of a shared interest in raising healthy kids. Choose one.

- ☐ Strongly agree
- ☐ Somewhat agree
- ☐ Neither agree nor disagree
- ☐ Somewhat disagree
- ☐ Strongly disagree
- ☐ Prefer not to answer

20. I feel a sense of contact with other moms on social media because of a shared interest in raising healthy kids. Choose one.

- ☐ Strongly agree
- ☐ Somewhat agree
- ☐ Neither agree nor disagree
- ☐ Somewhat disagree
- ☐ Strongly disagree
- ☐ Prefer not to answer

21. The reason I would feed my **X** year-old a healthy meal is (check all that apply):

- ☐ I would not – I do not see the point
- ☐ Because other people say I should
- ☐ Because I feel guilty when I don't
- ☐ Because I think it is important to make the effort to do so
- ☐ Because I consider it consistent with my values
- ☐ Because I enjoy doing so
- ☐ Prefer not to answer

For the next few questions, please think about your child's behavior **over the last month**.

22. During the past month, did your **X** year-old drink **water**? Include flavored water, seltzer; do **not** include water with added sweetener.

- ☐ Yes
- ☐ No
- ☐ Don't know
- ☐ Prefer not to answer.

23. *If yes to 4* During the past month, how often did your **X** year-old drink **water**?

- ☐ 1 time last month

- ☐ 2-3 times last month
- ☐ 1 time per week
- ☐ 2 times per week
- ☐ 3-4 times per week
- ☐ 5-6 times per week
- ☐ 1 time per day
- ☐ 2-3 times per day
- ☐ 4-5 times per day
- ☐ 6 or more times per day
- ☐ Prefer not to answer

24. During the past month, did your **X** year-old drink **milk**? Include regular milks, chocolate or other flavored milks, lactose-free milk; do **not** include soy milk, almond milk, other non-dairy milks.

- ☐ Yes
- ☐ No
- ☐ Don't know
- ☐ Prefer not to answer

25. *If yes to 6* During the past month, how often did your **X** year-old drink **milk**?

- ☐ 1 time last month
- ☐ 2-3 times last month
- ☐ 1 time per week
- ☐ 2 times per week
- ☐ 3-4 times per week
- ☐ 5-6 times per week
- ☐ 1 time per day
- ☐ 2-3 times per day
- ☐ 4-5 times per day
- ☐ 6 or more times per day
- ☐ Prefer not to answer

26. *If yes to 6* During the past month, what kind of milk did your **X** year-old usually drink? Choose one.

- ☐ Whole or regular milk
- ☐ 2% fat or reduced-fat milk
- ☐ 1%, ½%, or low-fat milk
- ☐ Fat-free, skim or nonfat milk
- ☐ Soy milk
- ☐ Other kind of milk: \_\_\_\_\_
- ☐ Prefer not to answer

27. During the past month, did your **X** year-old drink **regular soda or pop** that contains sugar? Do **not** include diet soda.

- ☐ Yes

- ☐ No
- ☐ Don't know
- ☐ Prefer not to answer

28. *If yes to 9* During the past month, how often did your **X** year-old drink **regular soda or pop**?

- ☐ 1 time last month
- ☐ 2-3 times last month
- ☐ 1 time per week
- ☐ 2 times per week
- ☐ 3-4 times per week
- ☐ 5-6 times per week
- ☐ 1 time per day
- ☐ 2-3 times per day
- ☐ 4-5 times per day
- ☐ 6 or more times per day
- ☐ Prefer not to answer

29. During the past month, did your **X** year-old drink **100% pure fruit juices** such as orange, mango, apple, grape and pineapple juices? Do **not** include fruit-flavored drinks with added sugar or fruit juice you made at home and added sugar to.

- ☐ Yes
- ☐ No
- ☐ Don't know
- ☐ Prefer not to answer

30. *If yes to 11* During the past month, how often did your **X** year-old drink **100% pure fruit juices**?

- ☐ 1 time last month
- ☐ 2-3 times last month
- ☐ 1 time per week
- ☐ 2 times per week
- ☐ 3-4 times per week
- ☐ 5-6 times per week
- ☐ 1 time per day
- ☐ 2-3 times per day
- ☐ 4-5 times per day
- ☐ 6 or more times per day
- ☐ Prefer not to answer

31. During the past month, did your **X** year-old drink sweetened fruit drinks, sports or energy drinks, such as Kool-Aid, lemonade, Hi-C, cranberry drink, Gatorade, Red Bull, or Vitamin Water? Include fruit juices you made at home and added sugar to. Do **not** include diet drinks or artificially sweetened drinks.

- ☐ Yes
- ☐ No



- ☐ Don't know
- ☐ Prefer not to answer

32. *If yes to 13* During the past month, how often did your **X** year-old drink **sweetened fruit drinks, sports or energy drinks?**

- ☐ 1 time last month
- ☐ 2-3 times last month
- ☐ 1 time per week
- ☐ 2 times per week
- ☐ 3-4 times per week
- ☐ 5-6 times per week
- ☐ 1 time per day
- ☐ 2-3 times per day
- ☐ 4-5 times per day
- ☐ 6 or more times per day
- ☐ Prefer not to answer

33. During the past month, did your **X** year-old eat **fruit**? Include fresh, frozen or canned fruit; do **not** include juice.

- ☐ Yes
- ☐ No
- ☐ Don't know
- ☐ Prefer not to answer

34. *If yes to 15* During the past month, how often did your **X** year-old eat **fruit**?

- ☐ 1 time last month
- ☐ 2-3 times last month
- ☐ 1 time per week
- ☐ 2 times per week
- ☐ 3-4 times per week
- ☐ 5-6 times per week
- ☐ 1 time per day
- ☐ 2 or more times per day
- ☐ Prefer not to answer

35. During the past month, did your **X** year-old eat a green leafy or lettuce **salad**, with or without other vegetables?

- ☐ Yes
- ☐ No
- ☐ Don't know
- ☐ Prefer not to answer

36. *If yes to 17* During the past month, how often did your **X** year-old eat **salad**?

- ☐ 1 time last month

- ☐ 2-3 times last month
- ☐ 1 time per week
- ☐ 2 times per week
- ☐ 3-4 times per week
- ☐ 5-6 times per week
- ☐ 1 time per day
- ☐ 2 or more times per day
- ☐ Prefer not to answer

37. During the past month, did your **X** year-old eat any kind of **fried potatoes**, including french fries, home fries, or hash brown potatoes?

- ☐ Yes
- ☐ No
- ☐ Don't know
- ☐ Prefer not to answer

38. *If yes to 19* During the past month, how often did your **X** year-old eat **fried potatoes**?

- ☐ 1 time last month
- ☐ 2-3 times last month
- ☐ 1 time per week
- ☐ 2 times per week
- ☐ 3-4 times per week
- ☐ 5-6 times per week
- ☐ 1 time per day
- ☐ 2 or more times per day
- ☐ Prefer not to answer

39. During the past month, did your **X** year-old eat any **other kind of potatoes**, such as baked, boiled, mashed potatoes, sweet potatoes, or potato salad?

- ☐ Yes
- ☐ No
- ☐ Don't know
- ☐ Prefer not to answer

40. *If yes to 21* During the past month, how often did your **X** year-old eat any **other kind of potatoes**?

- ☐ Never
- ☐ 1 time last month
- ☐ 2-3 times last month
- ☐ 1 time per week
- ☐ 2 times per week
- ☐ 3-4 times per week
- ☐ 5-6 times per week
- ☐ 1 time per day

- ☐ 2 or more times per day
- ☐ Prefer not to answer

41. During the past month, did your **X** year-old eat **refried beans, baked beans, beans in soup, pork and beans or any other type of cooked dried beans**? Do **not** include green beans.

- ☐ Yes
- ☐ No
- ☐ Don't know
- ☐ Prefer not to answer

42. *If yes to 23* During the past month, how often did your **X** year-old eat **refried beans, baked beans, beans in soup, pork and beans or any other type of cooked dried beans**?

- ☐ 1 time last month
- ☐ 2-3 times last month
- ☐ 1 time per week
- ☐ 2 times per week
- ☐ 3-4 times per week
- ☐ 5-6 times per week
- ☐ 1 time per day
- ☐ 2 or more times per day
- ☐ Prefer not to answer

43. During the past month, not including what you just told me about (green salads, potatoes, cooked dried beans), did your **X** year-old eat **other vegetables**?

- ☐ Yes
- ☐ No
- ☐ Don't know
- ☐ Prefer not to answer

44. *If yes to 25* During the past month, how often did your **X** year-old eat **other vegetables**?

- ☐ 1 time last month
- ☐ 2-3 times last month
- ☐ 1 time per week
- ☐ 2 times per week
- ☐ 3-4 times per week
- ☐ 5-6 times per week
- ☐ 1 time per day
- ☐ 2 or more times per day
- ☐ Prefer not to answer

45. During the past month, did your **X** year-old eat **chocolate or any other types of candy**? Do **not** include sugar-free candy.

- ☐ Yes
- ☐ No
- ☐ Don't know

☐ Prefer not to answer

46. *If yes to 27* During the past month, how often did your **X** year-old eat **chocolate or any other types of candy?**

- ☐ 1 time last month
- ☐ 2-3 times last month
- ☐ 1 time per week
- ☐ 2 times per week
- ☐ 3-4 times per week
- ☐ 5-6 times per week
- ☐ 1 time per day
- ☐ 2 or more times per day
- ☐ Prefer not to answer

47. During the past month, did your **X** year-old eat **doughnuts, sweet rolls, Danish, muffins, pan dulce, or Pop-Tarts?** Do **not** include sugar-free items.

- ☐ Yes
- ☐ No
- ☐ Don't know
- ☐ Prefer not to answer

48. *If yes to 29* During the past month, how often did your **X** year-old eat **doughnuts, sweet rolls, Danish, muffins, pan dulce, or Pop-Tarts?**

- ☐ 1 time last month
- ☐ 2-3 times last month
- ☐ 1 time per week
- ☐ 2 times per week
- ☐ 3-4 times per week
- ☐ 5-6 times per week
- ☐ 1 time per day
- ☐ 2 or more times per day
- ☐ Prefer not to answer

49. During the past month, did your **X** year-old eat **cookies, cake, pie or brownies?** Do **not** include sugar-free kinds.

- ☐ Yes
- ☐ No
- ☐ Don't know
- ☐ Prefer not to answer

50. *If yes to 31* During the past month, how often did your **X** year-old eat **cookies, cake, pie or brownies?**

- ☐ 1 time last month
- ☐ 2-3 times last month

- ☐ 1 time per week
- ☐ 2 times per week
- ☐ 3-4 times per week
- ☐ 5-6 times per week
- ☐ 1 time per day
- ☐ 2 or more times per day
- ☐ Prefer not to answer

51. During the past month, did your **X** year-old eat **ice cream or other frozen desserts**? Do not include sugar-free kinds.

- ☐ Yes
- ☐ No
- ☐ Don't know
- ☐ Prefer not to answer

52. *If yes to 33* During the past month, how often did your **X** year-old eat **ice cream or other frozen desserts**?

- ☐ 1 time last month
- ☐ 2-3 times last month
- ☐ 1 time per week
- ☐ 2 times per week
- ☐ 3-4 times per week
- ☐ 5-6 times per week
- ☐ 1 time per day
- ☐ 2 or more times per day
- ☐ Prefer not to answer

53. During the past month, did your **X** year-old eat **fast food**? Examples include McDonald's, Burger King, Chick-fil-A, Dunkin' Donuts, Subway, and Taco Bell.

- ☐ Yes
- ☐ No
- ☐ Don't know
- ☐ Prefer not to answer

54. *If yes to 35* During the past month, how often did your **X** year-old eat **fast food**?

- ☐ 1 time last month
- ☐ 2-3 times last month
- ☐ 1 time per week
- ☐ 2 times per week
- ☐ 3-4 times per week
- ☐ 5-6 times per week
- ☐ 1 time per day
- ☐ 2 or more times per day
- ☐ Prefer not to answer

*If yes to 35* For the next set of questions, please think about the foods your **X** year-old eats at a fast food or counter service restaurant.

55. When you take your **X** year-old to a fast food or counter service restaurant, which **menu** do you order from for your child? Choose one.

- ☐ Adult/regular menu
- ☐ Kid's menu
- ☐ Sometimes the adult menu, sometimes the kid's menu
- ☐ Items from both
- ☐ Prefer not to answer

56. When you take your **X** year-old to a fast food or counter service restaurant, what **side(s)** do you order for your child? Check all that apply.

- ☐ French fries/fried potatoes
- ☐ Fresh fruit (apple slices, fruit cup)
- ☐ Apple sauce
- ☐ Yogurt
- ☐ Other: \_\_\_\_\_
- ☐ Prefer not to answer

57. When you take your **X** year-old to a fast food or counter service restaurant, what **beverage** do you order for your child? Check all that apply.

- ☐ Water
- ☐ Milk
- ☐ Juice
- ☐ Soda/coke/pop
- ☐ Other: \_\_\_\_\_
- ☐ Prefer not to answer

58. How often do you order **dessert** for your **X** year-old at a fast food or counter service restaurant? Choose one.

- ☐ Never
- ☐ Occasionally
- ☐ About half the time
- ☐ More than half the time
- ☐ Always
- ☐ Prefer not to answer
